# Supplementary material
Source: MDPI journal article supplement (https://www.mdpi.com/search?q=water-12-02424)
Supplement: s001 [file water-12-02424-s001.pdf]

**Table S1.** List of the taxa along with the number of stations where this taxon was present and the number of collected individuals, for the 0.5 mm and the 1 mm size classes.

| Aphia ID | Phylum        | Accepted name                        | 0.5 mm size class |         | 1 mm size class |         |
|----------|---------------|--------------------------------------|-------------------|---------|-----------------|---------|
|          |               |                                      | Presence          | Density | Presence        | Density |
| 102866   | Arthropoda    | <i>Aceroides (Aceroides) latipes</i> | 22                | 57      | 14              | 27      |
| 136340   | Arthropoda    | <i>Akanthophoreus gracilis</i>       | 31                | 163     | 9               | 13      |
| 878476   | Mollusca      | <i>Ameritella agilis</i>             | 16                | 39      | 14              | 47      |
| 547000   | Arthropoda    | <i>Ameroculodes edwardsi</i>         | 8                 | 10      | 8               | 10      |
| 101908   | Arthropoda    | <i>Ampelisca macrocephala</i>        | —                 | —       | 1               | 2       |
| 158022   | Arthropoda    | <i>Ampelisca vadorum</i>             | 2                 | 2       | 2               | 2       |
| 101364   | Arthropoda    | Ampeliscidae spp.                    | —                 | —       | 5               | 7       |
| 762338   | Annelida      | <i>Ampharete oculata</i>             | —                 | —       | 1               | 8       |
| 129155   | Annelida      | <i>Ampharete</i> sp.                 | 1                 | 2       | —               | —       |
| 981      | Annelida      | Ampharetidae spp.                    | —                 | —       | 5               | 9       |
| 111186   | Bryozoa       | <i>Amphiblestrum auritum</i>         | 1                 | 1       | —               | —       |
| 125064   | Echinodermata | <i>Amphipholis squamata</i>          | —                 | —       | 9               | 133     |
| 1135     | Arthropoda    | Amphipoda                            | 44                | 127     | 6               | 20      |
| 123613   | Echinodermata | <i>Amphiura</i> sp.                  | —                 | —       | 1               | 1       |
| 102002   | Arthropoda    | <i>Ampithoe rubricata</i>            | —                 | —       | 2               | 3       |
| 882      | Annelida      | Annelida                             | 13                | 89      | —               | —       |
| 102513   | Arthropoda    | <i>Anonyx lilljeborgi</i>            | 9                 | 16      | 9               | 16      |
| 102516   | Arthropoda    | <i>Anonyx sarsi</i>                  | —                 | —       | 2               | 2       |
| 1292     | Cnidaria      | Anthozoa                             | 3                 | 4       | 4               | 5       |
| 101368   | Arthropoda    | Aoridae spp.                         | 1                 | 4       | —               | —       |
| 157214   | Annelida      | <i>Arcteobia anticostiensis</i>      | 1                 | 1       | 1               | 1       |
| 333034   | Annelida      | <i>Aricidea acmira catherinae</i>    | 3                 | 13      | —               | —       |
| 129430   | Annelida      | <i>Aricidea</i> sp.                  | 7                 | 57      | —               | —       |
| 531617   | Mollusca      | <i>Arrhoges occidentalis</i>         | 1                 | 1       | 3               | 4       |
| 137683   | Mollusca      | <i>Astarte</i> sp.                   | 8                 | 12      | 7               | 10      |
| 156746   | Mollusca      | <i>Astarte subaequilatera</i>        | —                 | —       | 3               | 12      |
| 156747   | Mollusca      | <i>Astarte undata</i>                | —                 | —       | 3               | 12      |
| 123219   | Echinodermata | <i>Asterias</i> sp.                  | 1                 | 1       | 1               | 1       |
| 141652   | Mollusca      | <i>Axinopsida orbiculata</i>         | 27                | 134     | 18              | 85      |
| 130275   | Annelida      | <i>Axiothella catenata</i>           | 2                 | 5       | 2               | 5       |
| 106122   | Arthropoda    | <i>Balanus</i> sp.                   | 1                 | 2       | —               | —       |
| 102873   | Arthropoda    | <i>Bathymedon longimanus</i>         | 4                 | 11      | 3               | 8       |
| 102875   | Arthropoda    | <i>Bathymedon obtusifrons</i>        | 2                 | 15      | 2               | 15      |
| 158034   | Arthropoda    | <i>Bathyporeia quoddyensis</i>       | —                 | —       | 2               | 2       |
| 105      | Mollusca      | Bivalvia                             | 114               | 10486   | 51              | 483     |
| 386411   | Mollusca      | <i>Boreochiton ruber</i>             | 8                 | 24      | —               | —       |
| 110397   | Arthropoda    | <i>Brachydiastylis</i> sp.           | 4                 | 24      | 6               | 28      |
| 106673   | Arthropoda    | Brachyura                            | 2                 | 2       | 2               | 2       |
| 146142   | Bryozoa       | Bryozoa                              | 3                 | 9       | —               | —       |
| 416573   | Arthropoda    | <i>Byblis gaimardii</i>              | 1                 | 1       | —               | —       |
| 110851   | Bryozoa       | <i>Callopora</i> sp.                 | 5                 | 9       | 5               | 9       |
| 1606     | Cnidaria      | Campanulariidae spp.                 | 1                 | 1       | —               | —       |
| 1607     | Cnidaria      | Campanulinidae spp.                  | 35                | 35      | —               | —       |
| 158057   | Arthropoda    | <i>Cancer irroratus</i>              | 2                 | 2       | —               | —       |
| 110734   | Bryozoa       | Candidae spp.                        | 9                 | 14      | 4               | 4       |
| 129211   | Annelida      | <i>Capitella</i> sp.                 | 1                 | 1       | —               | —       |
| 921      | Annelida      | Capitellidae spp.                    | 20                | 529     | —               | —       |

|         |               |                                 |    |     |    |     |
|---------|---------------|---------------------------------|----|-----|----|-----|
| 101851  | Arthropoda    | <i>Caprella septentrionalis</i> | 3  | 13  | —  | —   |
| 110873  | Bryozoa       | <i>Cellepora</i> sp.            | 9  | 370 | 6  | 275 |
| 111397  | Bryozoa       | <i>Celleporella hyalina</i>     | 1  | 1   | —  | —   |
| 2088    | Mollusca      | Chaetodermatida                 | 1  | 1   | —  | —   |
| 2081    | Chaetognatha  | Chaetognatha                    | 18 | 25  | 13 | 17  |
| 129242  | Annelida      | <i>Chaetozone</i> sp.           | 1  | 1   | —  | —   |
| 107315  | Arthropoda    | <i>Chionoecetes opilio</i>      | 1  | 4   | —  | —   |
| 140692  | Mollusca      | <i>Chlamys islandica</i>        | 2  | 2   | 2  | 2   |
| 129525  | Annelida      | <i>Chone</i> sp.                | 1  | 1   | 1  | 1   |
| 139000  | Mollusca      | <i>Ciliatocardium ciliatum</i>  | 1  | 12  | 1  | 12  |
| 919     | Annelida      | Cirratulidae spp.               | 1  | 1   | 6  | 17  |
| 1082    | Arthropoda    | Cirripedia                      | 16 | 246 | —  | —   |
| 238377  | Annelida      | <i>Cistenides granulata</i>     | 1  | 3   | 1  | 3   |
| 157317  | Annelida      | <i>Cistenides hyperborea</i>    | 24 | 56  | 43 | 142 |
| 157316  | Annelida      | <i>Cistenides</i> sp.           | 2  | 3   | —  | —   |
| 157320  | Annelida      | <i>Clymenella zonalis</i>       | 1  | 1   | —  | —   |
| 129984  | Annelida      | <i>Cossura longocirrata</i>     | —  | —   | 1  | 2   |
| 237004  | Arthropoda    | <i>Crassicorophium bonellii</i> | 1  | 6   | 1  | 6   |
| 140440  | Mollusca      | <i>Crenella decussata</i>       | 5  | 11  | —  | —   |
| 1059487 | Bryozoa       | <i>Cribrilina cryptoecium</i>   | 17 | 77  | 17 | 61  |
| 1066    | Arthropoda    | Crustacea                       | 1  | 1   | —  | —   |
| 1137    | Arthropoda    | Cumacea                         | 2  | 2   | —  | —   |
| 157810  | Arthropoda    | <i>Cyclaspis varians</i>        | 4  | 5   | —  | —   |
| 156832  | Mollusca      | <i>Cyclocardia borealis</i>     | —  | —   | 1  | 1   |
| 139474  | Mollusca      | <i>Cylichna alba</i>            | 1  | 5   | 3  | 7   |
| 140102  | Mollusca      | <i>Cyrtodaria siliqua</i>       | 3  | 16  | —  | —   |
| 111174  | Bryozoa       | <i>Dendrobeatia murrayana</i>   | 3  | 3   | 2  | 2   |
| 157815  | Arthropoda    | <i>Diastylis polita</i>         | 1  | 1   | —  | —   |
| 110487  | Arthropoda    | <i>Diastylis rathkei</i>        | —  | —   | 1  | 1   |
| 157817  | Arthropoda    | <i>Diastylis sculpta</i>        | 10 | 46  | 7  | 41  |
| 110398  | Arthropoda    | <i>Diastylis</i> sp.            | 16 | 95  | 11 | 47  |
| 131121  | Annelida      | <i>Dipolydora quadrilobata</i>  | 1  | 1   | 1  | 1   |
| 129611  | Annelida      | <i>Dipolydora</i> sp.           | 1  | 1   | —  | —   |
| 971     | Annelida      | Dorvilleidae spp.               | 1  | 1   | —  | —   |
| 117888  | Cnidaria      | <i>Dynamena pumila</i>          | 1  | 14  | —  | —   |
| 158062  | Echinodermata | <i>Echinarachnius parma</i>     | —  | —   | 1  | 1   |
| 123082  | Echinodermata | Echinoidea                      | 46 | 317 | 57 | 378 |
| 574096  | Mollusca      | <i>Ecrobia truncata</i>         | 3  | 7   | —  | —   |
| 157884  | Arthropoda    | <i>Edotia montosa</i>           | 5  | 56  | 2  | 19  |
| 157885  | Arthropoda    | <i>Edotia triloba</i>           | 3  | 5   | 4  | 6   |
| 111355  | Bryozoa       | <i>Electra pilosa</i>           | 6  | 13  | —  | —   |
| 506605  | Mollusca      | <i>Ennucula delphinodonta</i>   | 3  | 3   | —  | —   |
| 140584  | Mollusca      | <i>Ennucula tenuis</i>          | 1  | 1   | —  | —   |
| 1820    | Hemichordata  | <i>Enteropneusta</i>            | 53 | 229 | 58 | 211 |
| 130613  | Annelida      | <i>Eteone flava</i>             | 1  | 2   | —  | —   |
| 130616  | Annelida      | <i>Eteone longa</i>             | —  | —   | 1  | 7   |
| 129443  | Annelida      | <i>Eteone</i> sp.               | 2  | 12  | —  | —   |
| 157374  | Annelida      | <i>Eteone trilineata</i>        | 20 | 122 | 6  | 8   |
| 130903  | Annelida      | <i>Euchone analis</i>           | —  | —   | 1  | 1   |
| 129528  | Annelida      | <i>Euchone</i> sp.              | 9  | 243 | —  | —   |
| 111361  | Bryozoa       | <i>Eucratea loricata</i>        | 1  | 32  | 1  | 32  |

|         |               |                                           |    |      |    |     |
|---------|---------------|-------------------------------------------|----|------|----|-----|
| 1600    | Cnidaria      | Eudendriidae spp.                         | 12 | 12   | —  | —   |
| 110524  | Arthropoda    | <i>Eudorella emarginata</i>               | 4  | 4    | —  | —   |
| 157820  | Arthropoda    | <i>Eudorellopsis integra</i>              | 6  | 9    | 6  | 9   |
| 140536  | Mollusca      | <i>Euspira pallida</i>                    | 66 | 1163 | 63 | 669 |
| 117690  | Cnidaria      | <i>Filellum serpens</i>                   | 1  | 1    | 1  | 1   |
| 1207    | Arthropoda    | Gammaridea                                | 1  | 1    | —  | —   |
| 101537  | Arthropoda    | <i>Gammarus</i> sp.                       | 4  | 6    | —  | —   |
| 101     | Mollusca      | Gastropoda                                | —  | —    | 1  | 1   |
| 130116  | Annelida      | <i>Glycera alba</i>                       | 2  | 14   | —  | —   |
| 130118  | Annelida      | <i>Glycera capitata</i>                   | —  | —    | 4  | 17  |
| 157392  | Annelida      | <i>Glycera dibranchiata</i>               | 2  | 2    | 3  | 3   |
| 129296  | Annelida      | <i>Glycera</i> sp.                        | 8  | 25   | 5  | 7   |
| 130140  | Annelida      | <i>Goniada maculata</i>                   | 11 | 40   | 7  | 13  |
| 953     | Annelida      | Goniadidae spp.                           | 41 | 102  | 48 | 110 |
| 158095  | Arthropoda    | <i>Guerneia (Prinassus) nordenskioldi</i> | —  | —    | 2  | 4   |
| 1484    | Arthropoda    | Halacaridae spp.                          | 2  | 19   | —  | —   |
| 100667  | Cnidaria      | Halcampidae spp.                          | 6  | 44   | 1  | 1   |
| 1342053 | Mollusca      | <i>Haminoea solitaria</i>                 | 1  | 1    | —  | —   |
| 158099  | Arthropoda    | <i>Hardametopa carinata</i>               | 1  | 1    | 1  | 1   |
| 130769  | Annelida      | <i>Harmothoe imbricata</i>                | 1  | 1    | —  | —   |
| 129491  | Annelida      | <i>Harmothoe</i> sp.                      | 3  | 9    | 8  | 14  |
| 1102    | Arthropoda    | Harpacticoida                             | 3  | 3    | 3  | 3   |
| 102974  | Arthropoda    | <i>Harpinia propinqua</i>                 | 87 | 651  | 2  | 5   |
| 157436  | Annelida      | <i>Hartmania moorei</i>                   | —  | —    | 2  | 12  |
| 152302  | Annelida      | <i>Hediste diversicolor</i>               | 2  | 3    | —  | —   |
| 128143  | Arthropoda    | <i>Hemicythere villosa</i>                | 26 | 96   | 16 | 36  |
| 104054  | Brachiopoda   | <i>Hemithiris psittacea</i>               | 6  | 45   | —  | —   |
| 946     | Annelida      | Hesionidae spp.                           | —  | —    | 1  | 2   |
| 138749  | Mollusca      | <i>Heteranomia squamula</i>               | 1  | 2    | —  | —   |
| 140103  | Mollusca      | <i>Hiatella arctica</i>                   | 1  | 4    | 1  | 4   |
| 123083  | Echinodermata | Holothuroidea                             | 7  | 23   | 9  | 25  |
| 107323  | Arthropoda    | <i>Hyas coarctatus</i>                    | 4  | 6    | 4  | 6   |
| 1337    | Cnidaria      | Hydrozoa                                  | —  | —    | 1  | 1   |
| 157891  | Arthropoda    | <i>Idotea phosphorea</i>                  | 1  | 1    | —  | —   |
| 101389  | Arthropoda    | Ischyroceridae spp.                       | 3  | 13   | 3  | 11  |
| 102412  | Arthropoda    | <i>Ischyrocerus anguipes</i>              | 1  | 1    | 1  | 1   |
| 1131    | Arthropoda    | Isopoda                                   | 7  | 148  | 5  | 76  |
| 884676  | Annelida      | <i>Kirkegaardia</i> sp.                   | 1  | 1    | —  | —   |
| 140170  | Mollusca      | <i>Lacuna vincta</i>                      | 4  | 12   | 4  | 11  |
| 117136  | Cnidaria      | <i>Lafoea</i> sp.                         | 1  | 1    | —  | —   |
| 110516  | Arthropoda    | <i>Lamprops fasciatus</i>                 | 1  | 2    | 1  | 1   |
| 110517  | Arthropoda    | <i>Lamprops fuscatus</i>                  | 14 | 26   | 14 | 26  |
| 1307579 | Arthropoda    | <i>Lamprops quadriplicata</i>             | 2  | 2    | —  | —   |
| 140187  | Mollusca      | <i>Lepeta caeca</i>                       | 7  | 12   | 6  | 9   |
| 158112  | Arthropoda    | <i>Leptocheirus pinguis</i>               | 1  | 2    | —  | —   |
| 110501  | Arthropoda    | <i>Leptostylis ampullacea</i>             | 1  | 12   | 1  | 3   |
| 110618  | Arthropoda    | <i>Leucon (Leucon) nasica</i>             | 1  | 4    | —  | —   |
| 110619  | Arthropoda    | <i>Leucon (Leucon) nasicooides</i>        | 43 | 408  | 33 | 185 |
| 880017  | Mollusca      | <i>Limecola balthica</i>                  | 16 | 212  | 13 | 38  |
| 140262  | Mollusca      | <i>Littorina littorea</i>                 | 5  | 11   | 4  | 10  |
| 140263  | Mollusca      | <i>Littorina obtusata</i>                 | 1  | 1    | —  | —   |

|        |               |                                   |    |      |    |     |
|--------|---------------|-----------------------------------|----|------|----|-----|
| 967    | Annelida      | Lumbrineridae spp.                | 5  | 18   | 3  | 14  |
| 101395 | Arthropoda    | Lysianassidae spp.                | 3  | 5    | —  | —   |
| 141580 | Mollusca      | <i>Macoma calcarea</i>            | 88 | 584  | 84 | 420 |
| 138531 | Mollusca      | <i>Macoma</i> sp.                 | 2  | 5    | —  | —   |
| 158037 | Arthropoda    | <i>Maera danae</i>                | 1  | 1    | 1  | 1   |
| 130305 | Annelida      | <i>Maldane sarsi</i>              | 2  | 3    | 2  | 3   |
| 923    | Annelida      | Maldanidae spp.                   | 31 | 203  | 29 | 197 |
| 141819 | Mollusca      | <i>Margarites costalis</i>        | —  | —    | 1  | 3   |
| 138592 | Mollusca      | <i>Margarites</i> sp.             | 1  | 1    | —  | —   |
| 111411 | Bryozoa       | <i>Membranipora membranacea</i>   | 2  | 2    | —  | —   |
| 156805 | Mollusca      | <i>Mesodesma arctatum</i>         | 4  | 89   | 16 | 217 |
| 130349 | Annelida      | <i>Micronephthys neotena</i>      | 2  | 7    | —  | —   |
| 130168 | Annelida      | <i>Microphthalmus aberrans</i>    | 6  | 63   | —  | —   |
| 130174 | Annelida      | <i>Microphthalmus szcelkowi</i>   | 4  | 35   | —  | —   |
| 129313 | Annelida      | <i>Microphthalmus</i> sp.         | 1  | 1    | —  | —   |
| 101694 | Arthropoda    | <i>Monoculodes</i> sp.            | 6  | 20   | —  | —   |
| 102901 | Arthropoda    | <i>Monoculopsis longicornis</i>   | 2  | 5    | —  | —   |
| 140472 | Mollusca      | <i>Muculus (Musculus) discors</i> | 1  | 1    | 1  | 1   |
| 140430 | Mollusca      | <i>Mya arenaria</i>               | 1  | 4    | 11 | 17  |
| 156249 | Mollusca      | <i>Mya pseudoarenaria</i>         | 1  | 1    | —  | —   |
| 110949 | Bryozoa       | <i>Myriapora</i> sp.              | 1  | 1    | —  | —   |
| 876479 | Mollusca      | <i>Mysella planulata</i>          | 3  | 14   | 3  | 5   |
| 138228 | Mollusca      | <i>Mytilus</i> sp.                | 23 | 462  | 10 | 133 |
| 799    | Nematoda      | Nematoda                          | 61 | 1377 | 17 | 165 |
| 152391 | Nemertea      | Nemertea                          | 3  | 21   | 3  | 17  |
| 131069 | Annelida      | <i>Neoleanira tetragona</i>       | 1  | 1    | 1  | 1   |
| 956    | Annelida      | Nephtyidae spp.                   | 11 | 17   | 14 | 21  |
| 157499 | Annelida      | <i>Nephtys bucera</i>             | —  | —    | 5  | 5   |
| 130355 | Annelida      | <i>Nephtys caeca</i>              | 22 | 31   | 32 | 66  |
| 130356 | Annelida      | <i>Nephtys ciliata</i>            | —  | —    | 2  | 6   |
| 130362 | Annelida      | <i>Nephtys incisa</i>             | 35 | 73   | 37 | 75  |
| 130364 | Annelida      | <i>Nephtys longosetosa</i>        | 1  | 1    | —  | —   |
| 129370 | Annelida      | <i>Nephtys</i> sp.                | 23 | 6901 | —  | —   |
| 22496  | Annelida      | Nereididae spp.                   | 1  | 1    | —  | —   |
| 130404 | Annelida      | <i>Nereis pelagica</i>            | —  | —    | 1  | 1   |
| 156916 | Mollusca      | <i>Nucula proxima</i>             | —  | —    | 4  | 11  |
| 140577 | Mollusca      | <i>Nuculana minuta</i>            | 11 | 13   | 11 | 13  |
| 1566   | Arthropoda    | <i>Nymphonidae</i> spp.           | 1  | 1    | —  | —   |
| 117388 | Cnidaria      | <i>Obelia geniculata</i>          | 1  | 1    | —  | —   |
| 117389 | Cnidaria      | <i>Obelia longissima</i>          | 1  | 1    | —  | —   |
| 117034 | Cnidaria      | <i>Obelia</i> sp.                 | 5  | 5    | —  | —   |
| 137826 | Mollusca      | <i>Oenopota</i> sp.               | 9  | 10   | 9  | 10  |
| 2036   | Annelida      | Oligochaeta                       | 20 | 261  | 16 | 144 |
| 130494 | Annelida      | <i>Ophelia limacina</i>           | 11 | 18   | 13 | 16  |
| 924    | Annelida      | Opheliidae spp.                   | 2  | 3    | 2  | 3   |
| 125125 | Echinodermata | <i>Ophiopholis aculeata</i>       | 2  | 2    | 2  | 2   |
| 124933 | Echinodermata | <i>Ophiura robusta</i>            | 6  | 220  | 6  | 220 |
| 102690 | Arthropoda    | <i>Orchomenella minuta</i>        | 9  | 14   | 10 | 16  |
| 1078   | Arthropoda    | Ostracoda                         | 37 | 341  | —  | —   |
| 107240 | Arthropoda    | <i>Pagurus pubescens</i>          | 3  | 4    | 7  | 9   |
| 106854 | Arthropoda    | <i>Pagurus</i> sp.                | 1  | 1    | 1  | 1   |

|        |                 |                                  |    |      |    |     |
|--------|-----------------|----------------------------------|----|------|----|-----|
| 107651 | Arthropoda      | <i>Pandalus montagui</i>         | 1  | 1    | 1  | 1   |
| 903    | Annelida        | Paraonidae spp.                  | 1  | 1    | —  | —   |
| 111547 | Bryozoa         | <i>Parasmittina trispinosa</i>   | 1  | 1    | —  | —   |
| 954693 | Mollusca        | <i>Parathyasira equalis</i>      | 1  | 2    | 1  | 2   |
| 181343 | Mollusca        | <i>Parvicardium pinnulatum</i>   | 8  | 13   | 8  | 13  |
| 156940 | Mollusca        | <i>Periploma leanum</i>          | 3  | 5    | 3  | 5   |
| 110593 | Arthropoda      | <i>Petalosarsia declivis</i>     | —  | —    | 1  | 1   |
| 129293 | Annelida        | <i>Pherusa</i> sp.               | 2  | 5    | —  | —   |
| 423717 | Mollusca        | <i>Philine lima</i>              | 1  | 1    | 1  | 1   |
| 196322 | Mollusca        | Philinoidea                      | 1  | 2    | —  | —   |
| 127524 | Arthropoda      | <i>Philomedes</i> sp.            | 6  | 7    | 4  | 4   |
| 130602 | Annelida        | <i>Pholoe longa</i>              | 15 | 117  | 2  | 15  |
| 335827 | Annelida        | <i>Pholoe minuta tecta</i>       | 12 | 154  | —  | —   |
| 129439 | Annelida        | <i>Pholoe</i> sp.                | 69 | 304  | 41 | 92  |
| 1789   | Phoronida       | Phoronida                        | 18 | 1140 | —  | —   |
| 101403 | Arthropoda      | Phoxocephalidae spp.             | —  | —    | 1  | 1   |
| 102989 | Arthropoda      | <i>Phoxocephalus holbolli</i>    | 54 | 553  | 29 | 113 |
| 334506 | Annelida        | <i>Phyllodoce groenlandica</i>   | 22 | 520  | —  | —   |
| 334510 | Annelida        | <i>Phyllodoce maculata</i>       | 1  | 1    | —  | —   |
| 334512 | Annelida        | <i>Phyllodoce mucosa</i>         | —  | —    | 3  | 15  |
| 129455 | Annelida        | <i>Phyllodoce</i> sp.            | 6  | 16   | —  | —   |
| 931    | Annelida        | Phyllodocidae spp.               | 1  | 1    | 4  | 4   |
| 334519 | Annelida        | <i>Phylo ornatus</i>             | —  | —    | 1  | 1   |
| 793    | Platyhelminthes | Platyhelminthes                  | —  | —    | 3  | 3   |
| 101404 | Arthropoda      | Pleustidae spp.                  | 1  | 1    | —  | —   |
| 1091   | Arthropoda      | Podocopida                       | 8  | 104  | —  | —   |
| 155879 | Arthropoda      | Podoplea                         | 1  | 1    | —  | —   |
| 883    | Annelida        | Polychaeta                       | 24 | 24   | —  | —   |
| 129472 | Annelida        | <i>Polygordius</i> sp.           | 19 | 729  | —  | —   |
| 939    | Annelida        | Polynoidae spp.                  | 31 | 88   | 33 | 87  |
| 102223 | Arthropoda      | <i>Pontogeneia inermis</i>       | 1  | 6    | —  | —   |
| 101527 | Arthropoda      | <i>Pontogeneia</i> sp.           | —  | —    | 1  | 1   |
| 103079 | Arthropoda      | <i>Pontoporeia femorata</i>      | 36 | 361  | 30 | 295 |
| 130954 | Annelida        | <i>Potamilla neglecta</i>        | —  | —    | 1  | 10  |
| 130326 | Annelida        | <i>Praxillella praetermissa</i>  | 16 | 76   | 10 | 42  |
| 129360 | Annelida        | <i>Praxillella</i> sp.           | 1  | 2    | —  | —   |
| 131164 | Annelida        | <i>Prionospio steenstrupi</i>    | 22 | 1165 | —  | —   |
| 160446 | Mollusca        | <i>Propebela turricula</i>       | 6  | 6    | 6  | 6   |
| 102443 | Arthropoda      | <i>Protomedeia fasciata</i>      | 11 | 44   | 11 | 37  |
| 102444 | Arthropoda      | <i>Protomedeia grandimana</i>    | 45 | 1092 | 51 | 925 |
| 157836 | Arthropoda      | <i>Pseudoleptocuma minus</i>     | 4  | 11   | 4  | 17  |
| 136246 | Arthropoda      | <i>Pseudotanaïs</i> sp.          | 9  | 31   | —  | —   |
| 139975 | Mollusca        | <i>Puncturella noachina</i>      | 1  | 2    | —  | —   |
| 1302   | Arthropoda      | Pycnogonida                      | 2  | 4    | 2  | 4   |
| 131170 | Annelida        | <i>Pygospio elegans</i>          | 1  | 1    | —  | —   |
| 423709 | Arthropoda      | <i>Quasimelita formosa</i>       | 1  | 2    | 2  | 92  |
| 423710 | Arthropoda      | <i>Quasimelita quadrispinosa</i> | 25 | 102  | 28 | 109 |
| 141134 | Mollusca        | <i>Retusa obtusa</i>             | 1  | 2    | 1  | 2   |
| 985    | Annelida        | Sabellidae spp.                  | 8  | 14   | 7  | 9   |
| 127599 | Arthropoda      | <i>Sarsicytheridea</i> sp.       | 18 | 284  | 6  | 169 |
| 127951 | Arthropoda      | <i>Sclerochilus contortus</i>    | 15 | 271  | —  | —   |

|         |               |                                  |    |      |    |     |
|---------|---------------|----------------------------------|----|------|----|-----|
| 130261  | Annelida      | <i>Scoletoma fragilis</i>        | 1  | 2    | —  | —   |
| 129340  | Annelida      | <i>Scoletoma</i> sp.             | 11 | 39   | 10 | 35  |
| 130265  | Annelida      | <i>Scoletoma tetraura</i>        | 3  | 3    | 1  | 1   |
| 130537  | Annelida      | <i>Scoloplos armiger</i>         | 2  | 10   | —  | —   |
| 129425  | Annelida      | <i>Scoloplos</i> sp.             | 25 | 1299 | 9  | 85  |
| 110866  | Bryozoa       | <i>Scrupocellaria</i> sp.        | 2  | 2    | 1  | 1   |
| 582749  | Mollusca      | <i>Serripes groenlandicus</i>    | 1  | 1    | —  | —   |
| 1614    | Cnidaria      | Sertulariidae spp.               | 3  | 4    | 3  | 3   |
| 1268    | Sipuncula     | Sipuncula                        | 29 | 29   | —  | —   |
| 506189  | Mollusca      | <i>Solamen glandula</i>          | 18 | 32   | 15 | 27  |
| 138597  | Mollusca      | <i>Solariella</i> sp.            | 1  | 1    | 1  | 1   |
| 14635   | Mollusca      | Solenioidea                      | 11 | 34   | 11 | 23  |
| 131183  | Annelida      | <i>Spio filicornis</i>           | 8  | 31   | —  | —   |
| 129625  | Annelida      | <i>Spio</i> sp.                  | 9  | 20   | —  | —   |
| 913     | Annelida      | Spionidae spp.                   | 1  | 1    | —  | —   |
| 131187  | Annelida      | <i>Spiophanes bombyx</i>         | 5  | 7    | 1  | 1   |
| 156996  | Mollusca      | <i>Spisula solidissima</i>       | 5  | 16   | —  | —   |
| 101409  | Arthropoda    | Stenothoidae spp.                | 18 | 412  | —  | —   |
| 131077  | Annelida      | <i>Sthenelais limicola</i>       | 1  | 1    | 1  | 1   |
| 129595  | Annelida      | <i>Sthenelais</i> sp.            | 1  | 1    | —  | —   |
| 129678  | Annelida      | <i>Streptosyllis</i> sp.         | 2  | 2    | —  | —   |
| 123390  | Echinodermata | <i>Strongylocentrotus</i> sp.    | 1  | 8    | —  | —   |
| 196391  | Mollusca      | <i>Tachyrhynchus erosus</i>      | 5  | 26   | 21 | 87  |
| 234208  | Mollusca      | <i>Testudinalia testudinalis</i> | 1  | 1    | 1  | 1   |
| 129249  | Annelida      | <i>Tharyx</i> sp.                | —  | —    | 2  | 7   |
| 156454  | Mollusca      | <i>Thracia septentrionalis</i>   | 6  | 34   | —  | —   |
| 141663  | Mollusca      | <i>Thyasira gouldi</i>           | 23 | 83   | 20 | 57  |
| 138552  | Mollusca      | <i>Thyasira</i> sp.              | 30 | 142  | 29 | 118 |
| 760340  | Bryozoa       | <i>Tricellaria arctica</i>       | 1  | 11   | 8  | 44  |
| 160421  | Mollusca      | <i>Trichotropis bicarinata</i>   | 1  | 1    | —  | —   |
| 117258  | Cnidaria      | <i>Tubularia</i> sp.             | 2  | 2    | 2  | 2   |
| 160488  | Bryozoa       | <i>Tubuliporina</i> sp.          | 1  | 1    | —  | —   |
| 140348  | Mollusca      | <i>Turritellopsis stimpsoni</i>  | 1  | 1    | —  | —   |
| 158156  | Arthropoda    | <i>Unciola irrorata</i>          | 4  | 4    | 4  | 4   |
| 243     | Mollusca      | Veneridae spp.                   | —  | —    | 1  | 2   |
| 1255501 | Arthropoda    | <i>Wecomedon nobilis</i>         | 1  | 1    | 1  | 1   |
| 157005  | Mollusca      | <i>Yoldia limatula</i>           | —  | —    | 3  | 3   |
| 157006  | Mollusca      | <i>Yoldia myalis</i>             | 3  | 3    | 8  | 9   |

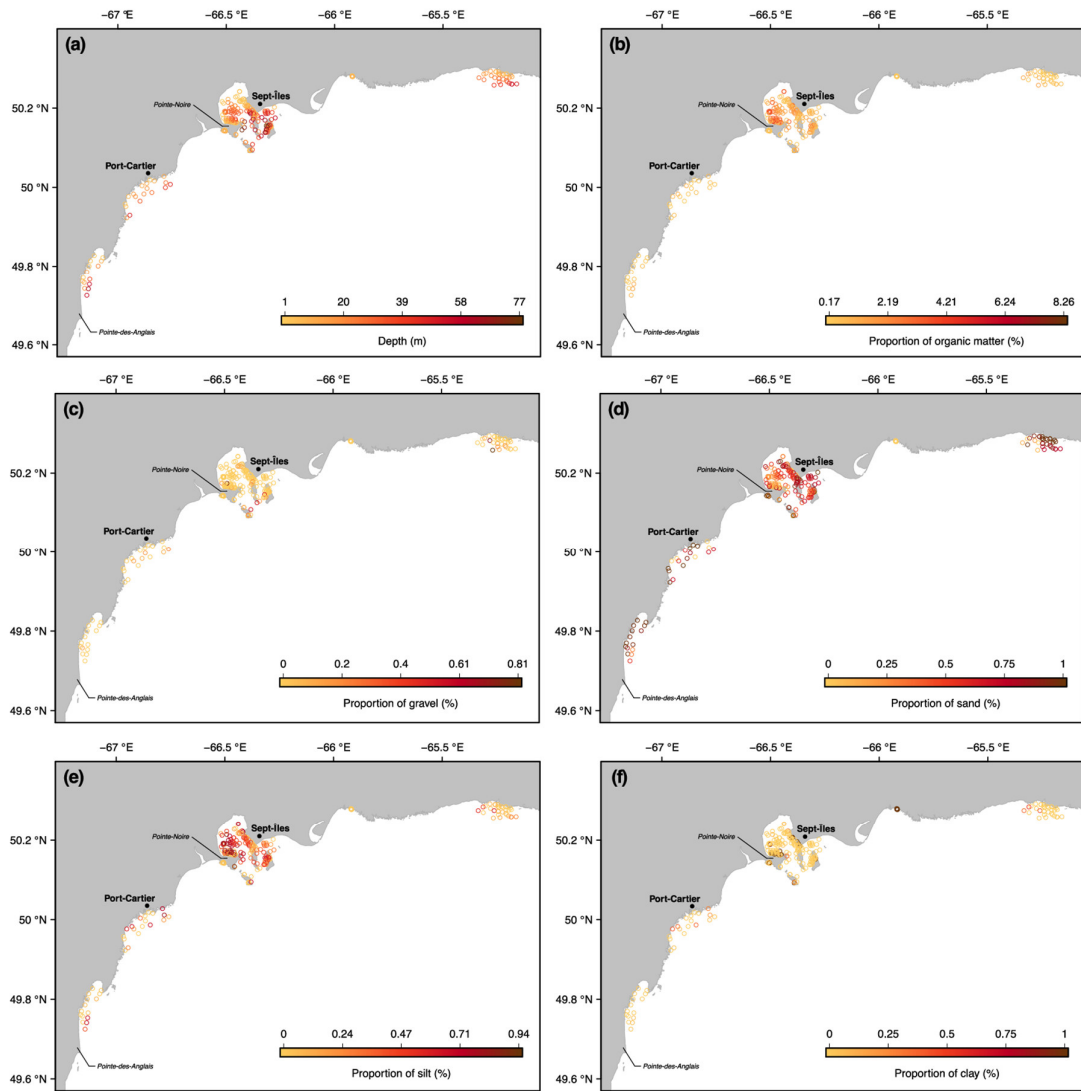

**Figure S1.** Values of habitat parameters at each station. **(a)** Map for station depth; **(b)** Map for organic matter content; **(c)** Map for gravel content; **(d)** Map for sand content; **(e)** Map for silt content; **(f)** Map for clay content.

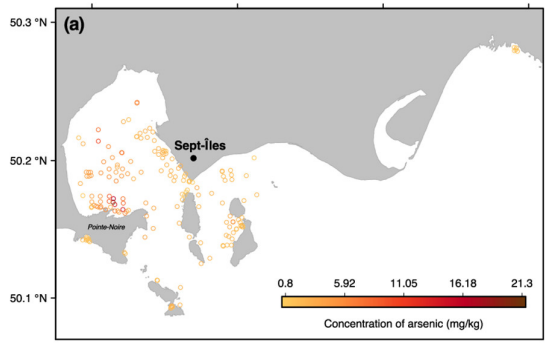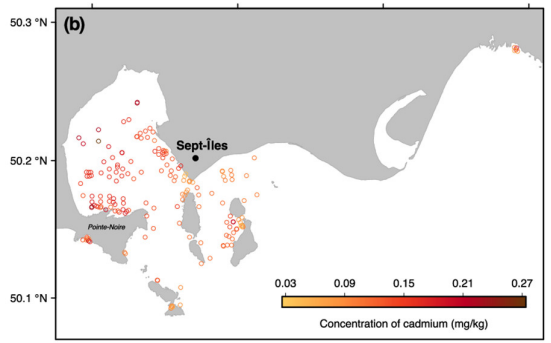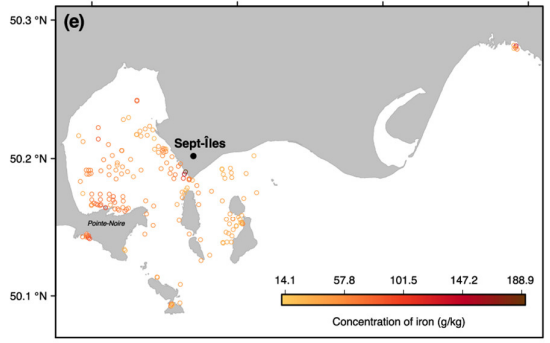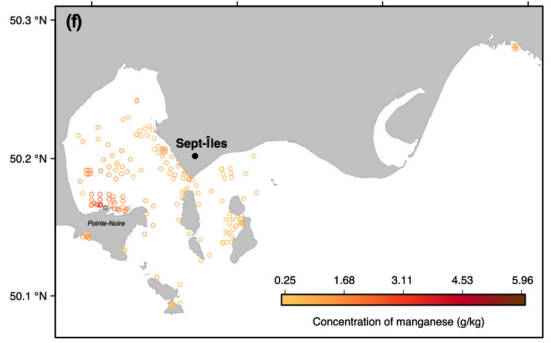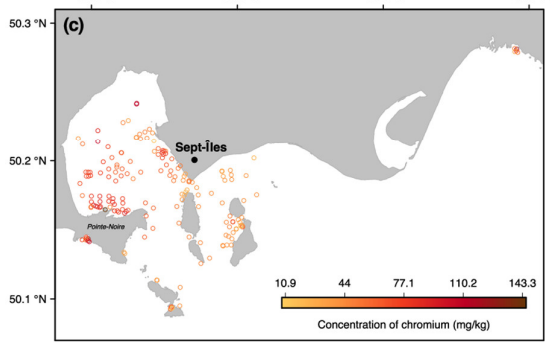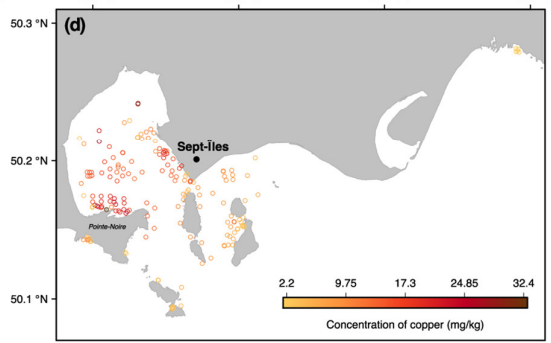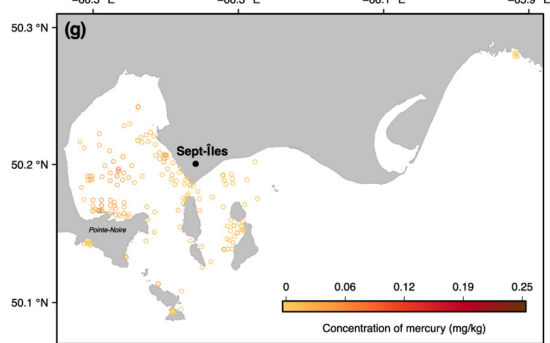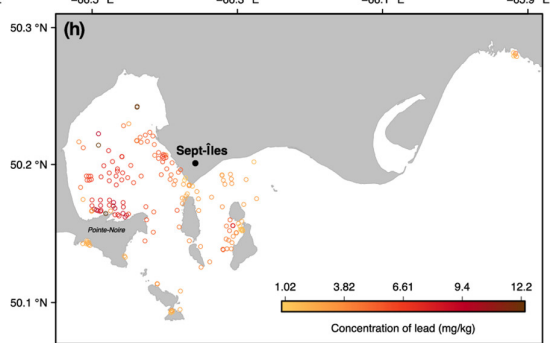



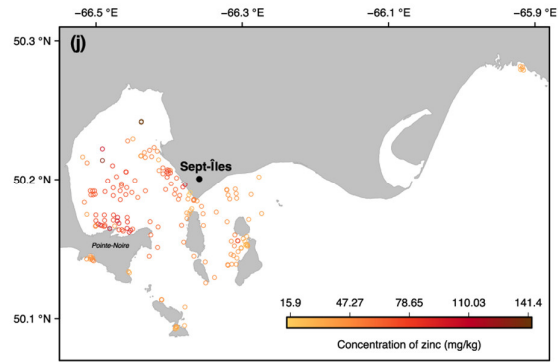

**Figure S2.** Values of heavy metal concentrations at each station. (a) Map for arsenic concentration; (b) Map for cadmium concentration; (c) Map for chromium concentration; (d) Map for copper concentration; (e) Map for iron concentration; (f) Map for manganese concentration; (g) Map for mercury concentration; (h) Map for lead concentration; (j) Map for zinc concentration

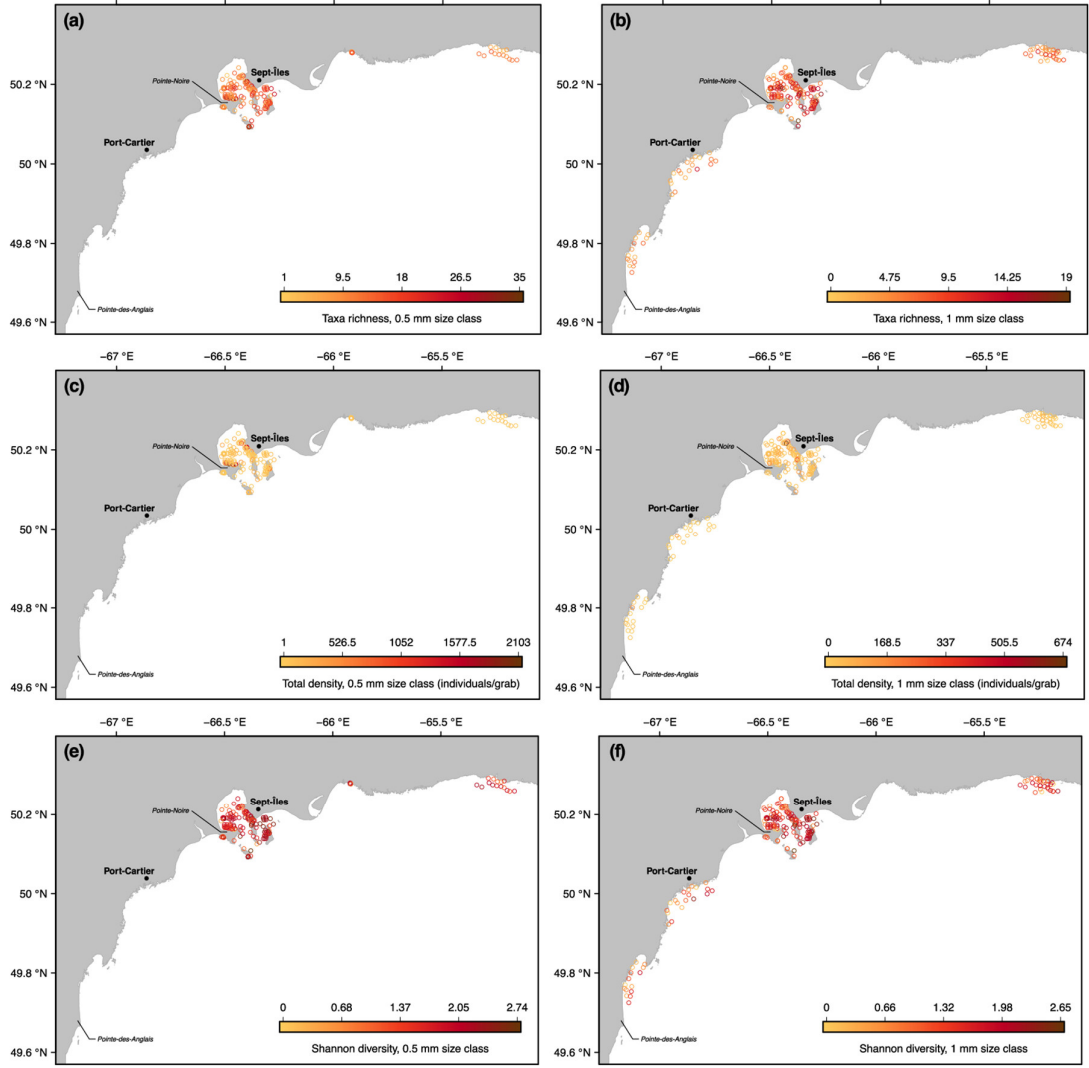

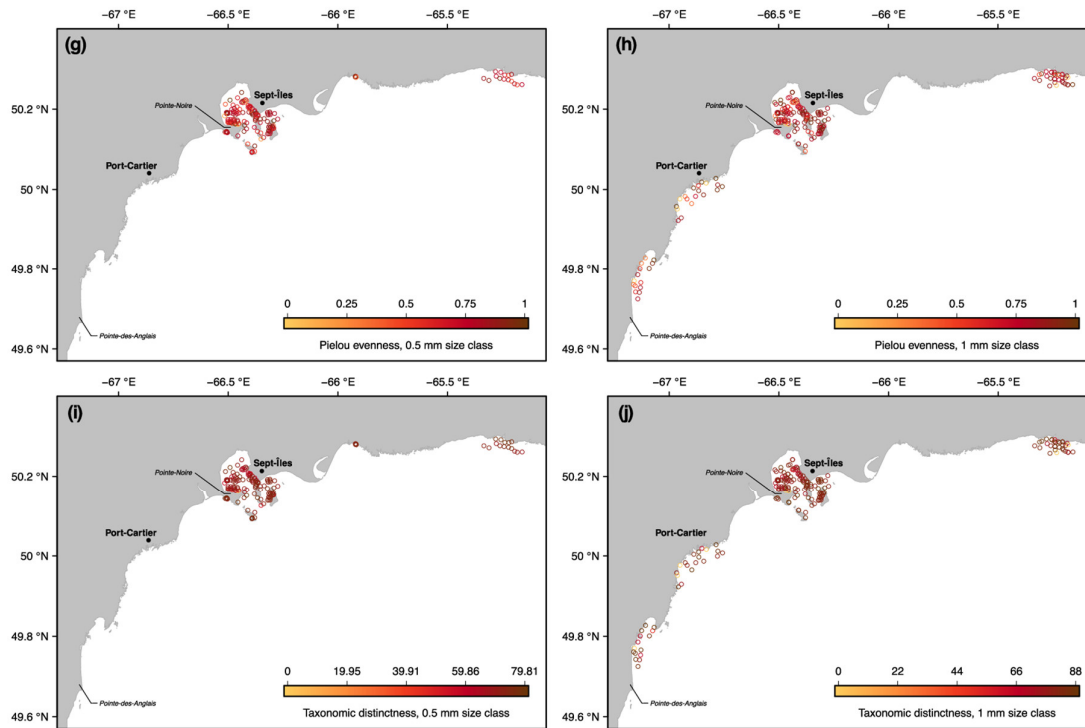

**Figure S3.** Values of community characteristics at each station. (a) Map for taxa richness for the 0.5 mm size class; (b) Map for taxa richness for the 1 mm size class; (c) Map for total density for the 0.5 mm size class; (d) Map for total density for the 1 mm size class; (e) Map for Shannon diversity for the 0.5 mm size class; (f) Map for Shannon diversity for the 1 mm size class; (g) Map for Pielou evenness for the 0.5 mm size class; (h) Map for Pielou evenness for the 1 mm size class; (i) Map for taxonomical distinctness for the 0.5 mm size class; (j) Map for taxonomical distinctness for the 1 mm size class
